# Supplementary material
Source: ML conference proceedings conference paper supplement (https://openreview.net/forum?id=XIZaWGCPl0b)
Supplement: supplementary_material [file attachment]

TESSERACT: Gradient Flip Score to Secure Federated Learning Against Model Poisoning Attacks

Author: Anonymous Author (Paper under double-blind review)

Requirement - PyTorch 1.8.1

The code when run downloads the dataset (MNIST and CIFAR-10) on its own, however, the dataset folder has been uploaded for convenience

Default run - "python main.py"

-- Runs FEDSGD aggregation with 10 benign clients on MNIST for 20 iterations

Example run - Running benign case followed by attack, followed by Tesseract's defense on MNIST

1) python main.py --gpu 0 --exp benign_fedsgd

2) python main.py --gpu 0 --byz_type full_trim --exp fulltrim_fedsgd

3) python main.py --gpu 0 --byz_type full_trim --aggregation tesseract --exp fulltrim_tesseract

The "main.py" file calls "aggregation.py" and "attack.py" to run the simulation of federated learning with the following command line arguments:

--dataset : mnist/ cifar10

--bias: controls the degree of non-iidness, 0.5 by default

--net : dnn for mnist, resnet18 for cifar10

--batch_size : 32 for mnist, 128 for cifar-10

--lr : learning rate - 0.01 for mnist, 0.1 for cifar10

--nworkers : 100 for mnist, 10 for cifar10

--nepochs : Number of training iterations, 500 for MNIST, 2000 for CIFAR-10

--gpu : 0 if CUDA is available, -1 otherwise

--nbyz : actual number of malicious workers (20% of nworkers)

--byz_type: benign/ full_trim/ full_krum/ adaptive_trim/ adaptive_krum

--aggregation : tesseract/ fedsgd/ krum/ trim (for trimmed mean)/ median/ faba/ foolsgold/ fltrust

--cmax : workers the aggregator expects to be malicious, set to be equal to nbyz

--decay : decay parameter for TESSERACT, default value = 0.99

--exp : name of the experiment given by the user

The code outputs a numpy vector - '<exp>_test_acc.npy' with the test accuracy values in every iteration, and '<exp>_model.pth' as the PyTorch model.

When the aggregation is Tesseract, two additional files are saved as outputs -

1)<exp>_FS.npy - Every row of this array represents one iteration, where every column is the flip-score of the respective client

Clients 0-19 are malicious and 20-99 are benign. Their behavior can be analyzed using this output file

2)<exp>_susp.npy - This contains the suspicion score of every client in a given iteration that was used to compute the reputation weights for aggregation in that iteration

For FoolsGold, FABA, and FLTrust, we output the corresponding client_list files that contains the reputation weight computed by those aggregation rules

*Competitive defense techniques require no additional input parameter.
